# Supplementary material for: Understanding the Political Challenge of Red and Processed Meat Reduction for Healthy and Sustainable Food Systems: A Narrative Review of the Literature
Source: PubMed Central journal article supplement (PMC9309962; doi:10.34172/ijhpm.2020.238), 2020-12-02
Supplement: ijhpm-10-793-s001.pdf [file ijhpm-10-793-s001.pdf]

## Supplementary file 1

**Table S1.** Policy Actions (Proposed and Existing) Aimed at Reducing Consumption and/or Production of Red/Processed Meat

| Policy action domain                                           |                                                                                           | Policy action example                                                                                                                                                                                                                                              |
|----------------------------------------------------------------|-------------------------------------------------------------------------------------------|--------------------------------------------------------------------------------------------------------------------------------------------------------------------------------------------------------------------------------------------------------------------|
| <i>Governance (including policy and regulatory frameworks)</i> | Dietary guidelines reform                                                                 | <i>Holistic dietary guidelines</i> - reform national dietary guidelines to consider both health and sustainability, including the promotion of reduced/minimal RPM consumption <sup>153,188,191-193</sup>                                                          |
|                                                                | Governance structures                                                                     | <i>Corporate Social Responsibility</i> – Self-regulating business model that promotes companies to be environmentally accountable <sup>194</sup>                                                                                                                   |
| <i>Food supply</i>                                             | Fiscal measures                                                                           | <i>Investment in agricultural technologies</i> – Government investment in technologies that assist farm production to be more environmentally efficient, eg, water management systems, more efficient carbon sequestration <sup>92,118,121,153,193,195-215</sup>   |
|                                                                |                                                                                           | <i>Carbon/emissions tax</i> – eg, production taxes on an agricultural level around GHG emissions (incl. nitrogen) <sup>23,32,87,88,91,93,94,117,120,122,151,153,191-193,206,212,216-222</sup>                                                                      |
|                                                                |                                                                                           | <i>Environmental practice incentive/subsidy</i> – Subsidise or give financial/other incentives to farmers who adopt environmentally friendly methods of RPM production <sup>32,87,88,116,123,153,198,206,207</sup>                                                 |
|                                                                |                                                                                           | <i>Agricultural subsidies (removal of)</i> – Remove current subsidies that promote intensive animal agriculture <sup>97,125,195,201,216</sup>                                                                                                                      |
|                                                                |                                                                                           | <i>Production quota</i> – set limits for animal agriculture production <sup>151,201</sup>                                                                                                                                                                          |
|                                                                |                                                                                           | <i>Ecological compensation/true pricing</i> - Integrating health and environmental externalities into food pricing and/or government/commercial accounting methods <sup>115,218</sup>                                                                              |
|                                                                |                                                                                           | <i>Biodiversity offsets</i> – any predicted biodiversity impacts in agricultural practices must be minimised and/or reversed, and then remaining impacts should be compensated elsewhere <sup>115</sup>                                                            |
|                                                                |                                                                                           | <i>Regulation of land clearing</i> – Implement limits on the amount of land able to be converted for agricultural purposes <sup>125</sup>                                                                                                                          |
|                                                                | Waste management                                                                          | <i>Reduction of food waste</i> – No specific definition was mentioned in the studies, however an example of a policy action would be adding value to non-utilised fruits/vegetables that ordinarily would not meet market acceptability <sup>118,121,124,214</sup> |
| Trade                                                          | <i>Import tax</i> – Adoption of tariffs on imported RPM products <sup>95,96,163,223</sup> |                                                                                                                                                                                                                                                                    |

|                           |                                                                                                     |                                                                                                                                                                                                                                                                                                                                                                                                                                                                                                                                                                                                                                 |
|---------------------------|-----------------------------------------------------------------------------------------------------|---------------------------------------------------------------------------------------------------------------------------------------------------------------------------------------------------------------------------------------------------------------------------------------------------------------------------------------------------------------------------------------------------------------------------------------------------------------------------------------------------------------------------------------------------------------------------------------------------------------------------------|
|                           |                                                                                                     | <p><i>Trade policy</i> – Various options were suggested in the literature, for example, removing free trade of food commodities that generate high greenhouse gas emissions i.e. red meat <sup>96,198</sup></p> <p><i>Tradeable quotas (eg, nitrogen)</i> – implement set limits for trade of high nitrogen producing food commodities i.e. red meat <sup>127,151</sup></p> <p><i>Regulation of international corporate tax havens</i> – Increasing transparency of off-shore tax processes in low-regulation countries such as Bermuda, in order to remove anonymity of investments made in harmful sectors <sup>224</sup></p> |
| <i>Food environment</i>   | Fiscal measures                                                                                     | <i>Meat tax</i> - consumption tax designed to increase the cost of red/processed meats <sup>32,89-91,97,98,116,123,124,151,153,163,196,208,209,221,225-234</sup>                                                                                                                                                                                                                                                                                                                                                                                                                                                                |
|                           |                                                                                                     | <i>Subsidies for fruit/veg</i> - Implement subsidies or remove taxes on fruit and vegetables in order to decrease the cost and promote over RPM <sup>227,234</sup>                                                                                                                                                                                                                                                                                                                                                                                                                                                              |
|                           | Labelling                                                                                           | <i>Consumer labelling</i> – eg, package labels that communicate information about the total greenhouse emissions released throughout production and transport of RPM <sup>95,116,122-124,151-153,163,173,193,194,207-209,219,221,233,235,236</sup>                                                                                                                                                                                                                                                                                                                                                                              |
|                           | Availability                                                                                        | <i>Meat substitution/Alternative proteins</i> – promotion and increased availability of alternative sources of protein eg, tofu, lentils, cultured meat <sup>116,118,123,237-239</sup>                                                                                                                                                                                                                                                                                                                                                                                                                                          |
|                           |                                                                                                     | <i>Meat ban</i> - government policy that removes availability of RPM available for purchase <sup>123</sup>                                                                                                                                                                                                                                                                                                                                                                                                                                                                                                                      |
|                           |                                                                                                     | <i>Meat rationing</i> – government policy that sets limits on the amount of RPM available for purchase <sup>123</sup>                                                                                                                                                                                                                                                                                                                                                                                                                                                                                                           |
|                           | Procurement                                                                                         | <i>Public food programs</i> - Set specifications around RPM reduction/replacement for public procurement by government institutions including schools, hospitals, armed forces, and prisons <sup>163,188</sup>                                                                                                                                                                                                                                                                                                                                                                                                                  |
| Advertising and promotion | <i>Marketing/advertising restrictions</i> – Restricting marketing of RPM products <sup>32,194</sup> |                                                                                                                                                                                                                                                                                                                                                                                                                                                                                                                                                                                                                                 |
| <i>Consumer Behaviour</i> | Information provision                                                                               | <i>Consumer education</i> – developing public education initiatives or social marketing campaigns that inform consumers on the health/environmental impacts of RPM <sup>23,32,105,117,120,123-126,162,192,219,221,233,238</sup>                                                                                                                                                                                                                                                                                                                                                                                                 |
|                           | Non-information provision                                                                           | <i>Consumer nudging</i> – eg, incorporating plant semi-manufactures in meat products, in an effort to make eating sustainable products gradually become more accessible <sup>120,238,240</sup>                                                                                                                                                                                                                                                                                                                                                                                                                                  |
|                           | Community-led initiatives                                                                           | <i>Consumer alliances</i> – promotion of social movements or advocacy groups aimed at informing consumers and advocating for policy around RPM reduction <sup>238</sup>                                                                                                                                                                                                                                                                                                                                                                                                                                                         |
